# Supplementary material
Source: publisher site journal article supplement (https://www.dovepress.com/article/366460)
Supplement: Supplementary file 1 [file get_supplementary_file.php]

**Supplementary Materials**

**Study 302 – Participating study sites**

M. Agronin

Miami Jewish Home and Hospital for the Aged

Miami, FL

L. Borrell

Senior Adult Specialty Research

Houston, TX

L. Bricker

Henry Ford Hospital

Detroit, MI

E. Burdick

Segal Institute for Clinical Research

North Miami, FL

K. Cross

Nathan Adelson Hospice

Las Vegas, NV

P. Erdman

Physicians Administrative Support Services

Tucker, GA

G. Fyles

British Columbia Cancer Agency, Centre for the Southern Interior

Kelowna, British Columbia, Canada

B. Gagnon

McGill University Health Centre

Montreal, Québec, Canada

C. Harrison

Palliative Medicine Consultants

Rockville, MD

J. Kerlin

American Health Network

Avon, IN

C. Kohlenberg

Independent Psychiatric Consultants

Waukesha, WI

M. Krehe

Penn State Milton S. Hershey Medical Center

Hershey, PA

D. Linden

Linden Research Consultants

Oklahoma City, OK

A. Lipman

Care Source Hospice–Home Health Palliative Care

Salt Lake City, UT

D. McGrew

Hospice and Palliative Physician Services

Springhill, FL

M. Moehl-Boatwright

LifePath Hospice and Palliative Care

Tampa, FL

M.D. Mollen

Arizona Research Center

Phoenix, AZ

M. Patel

Valley Medical Primary Care

Centerville, OH

J.F. Peppin

Iowa Pain Management Clinic

West Des Moines, IA

F. Sicuro

Millennium Psychiatric Associates

St. Louis, MO

B.A. Sloan

Bridgeport Manor

Bridgeport, CT

C. Wellman

Hospice of the Western Reserve

Cleveland, OH

J. Winston

Senior Adult Specialty Research

Austin, TX

**Study 4000 – Participating Study Sites**

Richard Levene

Hospice of Palm Beach County

West Palm Beach, FL

Chuck Wellman

Hospice of the Western Reserve

Cleveland, OH

Kumarasamy Sivakumar

Research Center for Clinical Studies-West, Inc.

Lancaster, CA

Jared Winston

Senior Adult Specialty Research

Austin, TX

Richard Stephenson

Hospice & Palliative Care Center

Salem, NC

Donna Zhukovsky

M.D. Anderson Cancer Center

Investigator Pharmacy Services

Houston, Texas

David McGrew

Hernando Pasco Hospice, Inc.

Hudson, FL

Sloan Beth Karver

H. Lee Moffitt Cancer and Research Institute Investigational Drug Services Pharmacy Department, Moffitt Cancer Center

Tampa, FL

Marcin Chwistek

Fox Chase Cancer Center

Philadelphia, PA

Janet Bull

Four Seasons Hospice and Palliative Care

Flat Rock, NC

Maria Jakobsson

Palliative Unit Vrinnevi Hospital

Apoteket Vrinnevisjukhuset EA 82

Norrköping, Sweden

Gunnar Eckerdale

ASIH Kungsbacka Narsjukhus

Varbergs Sjukhusapotek

Varberg, Sweden

Jose Gamez

Galiz Research, LLC

Miami Springs, FL

Ana Casas

Hospital Virgen del Rocio

Edificio Hospital General Servicio de Farmacia Unidad de Ensayos Clinicos Avda

Sevilla, Spain

Pere Gascon

Hospital Clinic i Provincial

Agencia Ensayos Clinicos

Barcelona, Spain

Jose Espinosa

Institut Catala d Oncologia

Hospitalet del Llobregat

Llobregat, Spain

Walter Cosolo

John Fawkner Private Hospital

HPS Pharmacies Brunswick

Brunswick, Victoria, Australia

Presidio Ospedaliero "San Salvatore"

Ospedale Civile San Salvatore Unita Operativa

Complessa del farmaco Farmacia Ospedaliera

Viale San Salvatore Coppito (l'Aquila)/ Italia

Italy

Furlo Zucco

Azienda Ospedaliera G. Salvini

Unita' di Cure Palliative e Terapia del Dolore Viale Forlanini 121 Garbagnate Milanese Milano, Italy

Augusto Tommaso Caraceni

Istituto Nazionale Tumori

Fondaz. IRCCS 1st. Nazionale Tumori S. C. Farmacia

Milano, Italy

Richard Chye

St Vincent's Hospital

Linda Hotong Clinical Trials Pharmacist Pharmacy Store

Darlinghurst, Australia

Frank Elsner

University of Aachen

Med. Fakultaet der RWTH Aachen Klinik fuer Palliativmedizin Pauwelsstr. 30 Aachen 52074 Germany

Thomas Jehser

Gemeinschaftskrankenhaus Havelhoehe Zentrum fuer Schmerz- und Palliativmedizin

Kladower Damm 221 Station 11

Berlin, Germany

Odette Spruyt

Peter MacCallum Cancer Institute

Pharmacy Department

East Melbourne, Victoria, Australia

Bernard J Lapointe

Hopital General Juif - Sir Mortimer B. Davis Main Pharmacy 3755 Chemin de la Cote Ste- Catherine Suite C-005 Montreal, QC H3T 1E2 Canada

Bruno Gagnon

Centre Universita de Santa McGill

McGill University Health Centre Montreal General Hospital

Montreal, Quebec, Canada

Standiford II Helm

Pacific Coast Pain Management Center

Laguna Hills, CA

Paul Daeninck

St. Boniface General Hospital

Winnipeg, Manitoba, Canada

Johan Menten

UZ Leuven

Apotheek Herestraat

Leuven, Belgium

Guillemette Laval

CH MICHALLON CHU GRENOBLE

Grenoble, Cedex, France

Ragis Aubry

Hopital Jean MINJOZ Unite de Soins Palliatifs

Besancon, France

Benoit Burucoa

CHU BORDEAUX Hopital Saint Andre

Bordeaux, France

Josyane Chevalier-Michaud

HOPITAL SAINT-ELOI

Montpellier, France

Sophie Laurent

Institut de Cancerologie Gustave Roussy

Centre d'Ãvaluation et de traitement de la douleur et de soins palliatifs

Villejuif, France

Beverley Hattersley

St Peter's Hospital

Pharmacy Dept. 88

Hamilton, Ontario, Canada

Paul Perkins

Leckhampton Court Hospice

Pharmacy Department Cheltenham General Hospital

Cheltenham, Gloucestershire

Louis Roy

Hatel-Dieu de Quebec

C.H.U.Q Pavillion Hotel-Dieu de Quebec 6

Quebec, Canada

Ronald Schonwetter

Lifepath Hospice

Tampa, FL

Gary Garner

Rocky Mountain Clinical

Orem, UT

James Cleary

Susan Johnston University of Wisconsin Hospital and Clinics Pharmaceutical

Research Center

Madison, WI

Michael Harris

Aspen Clinical Research

Orem, UT

Walter Forman

Lovelace Scientific Resources

Albuquerque, NM

Sharon Watanabe

Cross Cancer Institute

Edmonton, Alberta, Canada

Sandra Serrano

Hospital AC Camargo

Sao Paulo, Brazil

Deborah Thorpe

Huntsman Cancer Hospital, Investigational Pharmacy Services

Salt Lake City, UT

Nora Godinez

Eleccion Salud Dr.Jose Maria Vertiz #1097, Col.Vertiz Narvarte Delegacion Benito Juarez C.P.03600

Distrito Federal, Mexico

Victor Chang

Dept. of VA Affairs NJ Healthcare System

East Orange, NJ

Mark Marilley

701 Doctors Drive Suite N

Kinston, NC
